# Supplementary material for: Mechanochemistry-induced recycling of spent lithium-ion batteries for synergistic treatment of mixed cathode powders
Source: Royal Society of Chemistry journal article supplement (doi:10.1039/d2gc01929a), 2022-01-01
Supplement: d2gc01929a1.pdf [file d2gc01929a1.pdf]

## Supporting Information

### **Mechanochemistry-induced Recycling of Spent Lithium-ion Batteries for Synergistic Treatment of Mixed Cathode Powders**

Youzhou Jiang<sup>a</sup>, Xiangping Chen<sup>b\*</sup>, Shuxuan Yan<sup>a</sup>, Yudie Ou<sup>a</sup> and Tao Zhou<sup>a\*</sup>

<sup>a</sup> Hunan Provincial Key Laboratory of Chemical Power Sources, College of Chemistry and Chemical Engineering, Central South University, Changsha 410083, P.R. China;

<sup>b</sup> School of Environmental Science and Engineering, Shaanxi University of Science & Technology, Xi'an 710021, P.R. China.

\*Corresponding authors:

[chenxiangping@sust.edu.cn](mailto:chenxiangping@sust.edu.cn) (X-P. Chen); [zhoutao@csu.edu.cn](mailto:zhoutao@csu.edu.cn) (T. Zhou).

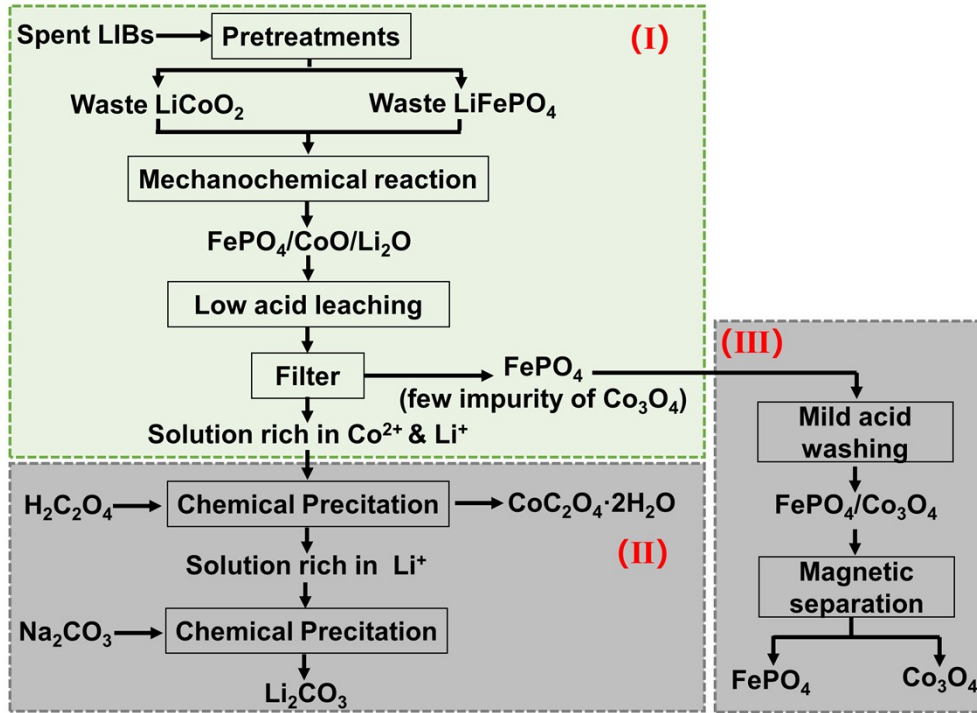

**Fig. S1.** The proposed green approach for synergetic recovery different cathodes materials from spent LIBs though mechanochemical process. Part (I): Experimental process of mechanochemical reaction and stoichiometric acid leaching for recovering different cathodes from spent LIBs, in which pretreatments include discharge, dismantling, and detachment; Part (II): Separation and recovery of cobalt and lithium compound products; Part (III): Purification and recovery of  $\text{FePO}_4$ .

**Note:** During pretreatment process,  $\text{LiPF}_6$  in electrolytes will be quickly decomposed into solid  $\text{LiF}$  and gaseous  $\text{PF}_5$  with the detailed chemical reaction of  $\text{LiPF}_6(\text{l}) \rightarrow \text{LiF}(\text{s}) + \text{PF}_5(\text{g})$ . The gaseous  $\text{PF}_5$  can be absorbed by specific adsorbents and the solid  $\text{LiF}$  will usually flow into the slag due to its high melting point ( $848^\circ\text{C}$ ) and boiling point ( $1681^\circ\text{C}$ ). And the composition of leaching residues after leaching of mixed cathode materials is mixture of  $\text{FePO}_4$ , little amount of  $\text{Co}_3\text{O}_4$  impurity.

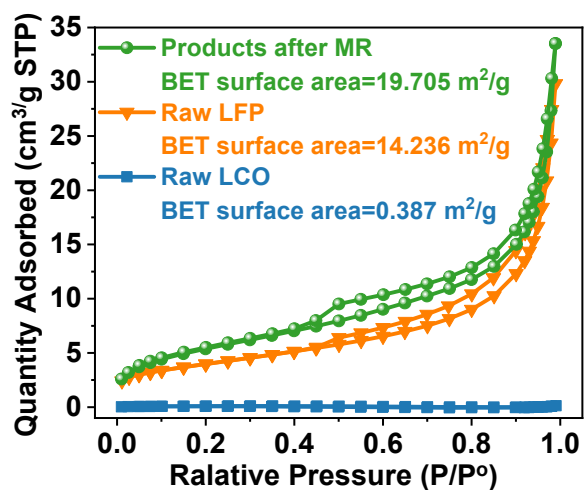

**Fig. S2.** Nitrogen adsorption-desorption curves of raw materials and product after mechanochemical reaction (conditions: molar ratio of LCO:LFP = 1:1, rotation speed- 650 rpm, mechanical milling time- 5 h, mass ratio of ball to powder- 50:1).

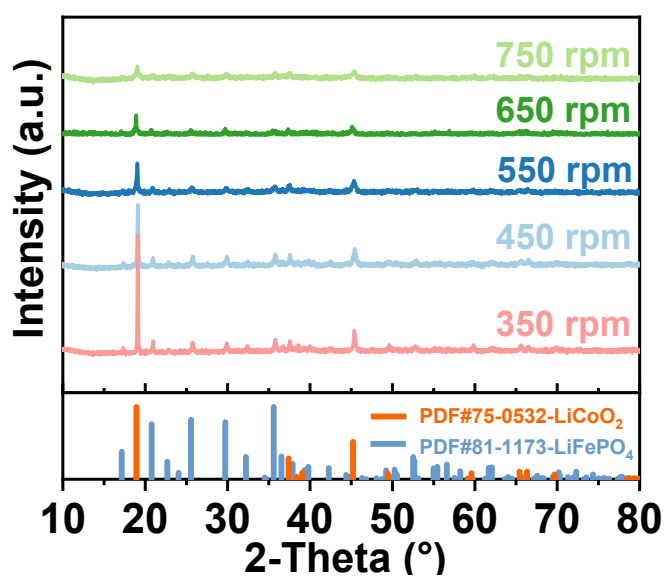

**Fig. S3.** XRD patterns of samples under different rotation speed. (conditions: molar ratio of LCO:LFP = 1:1, mechanical milling time- 5 h, mass ratio of ball to powder- 50:1)

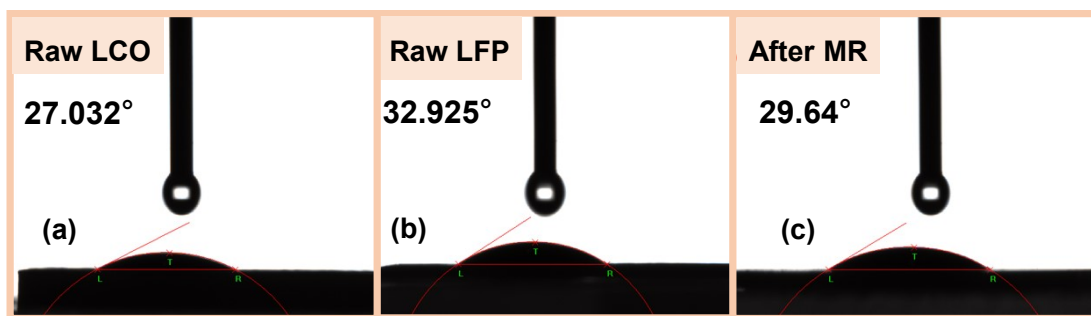

**Fig. S4.** Contact angle of water on the surface of (a) raw LCO, (b) raw LFP and (c) samples after mechanochemical reaction (conditions: molar ratio of LCO:LFP = 1:1, rotation speed- 650 rpm, mechanical milling time- 5 h, mass ratio of ball to powder- 50:1).

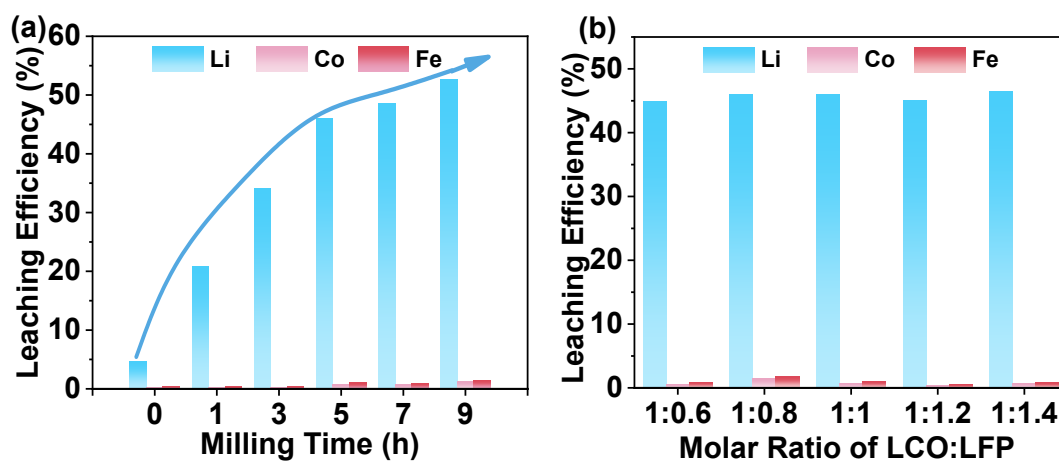

**Fig. S5.** Effect of (a) milling time and (b) molar ratio of LCO:LFP on the leaching efficiency of metal elements by water leaching.

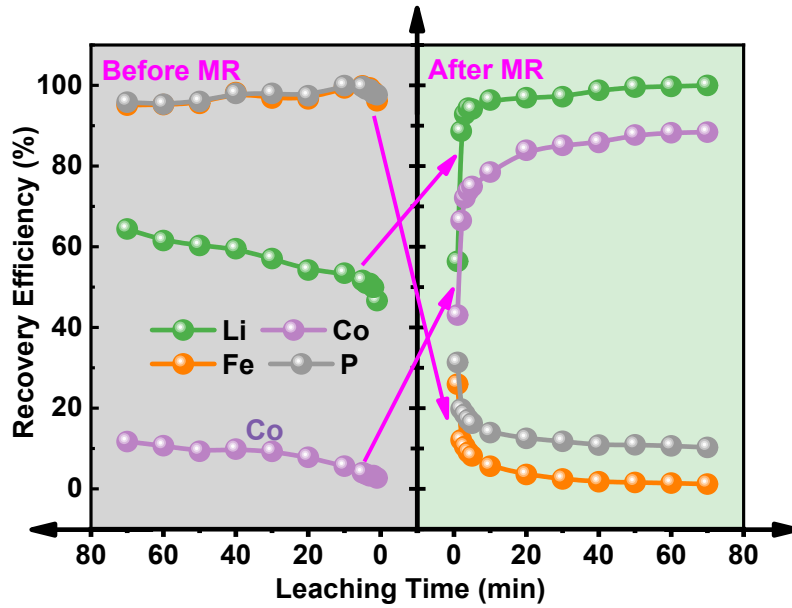

**Fig. S6.** Illustration of different leaching behaviors for different elements before and after MR. (650 rpm, 5 h, LCO: LFP=1:1, ball to powder ratio of 50:1; 0.15M  $\text{H}_2\text{SO}_4$ ).

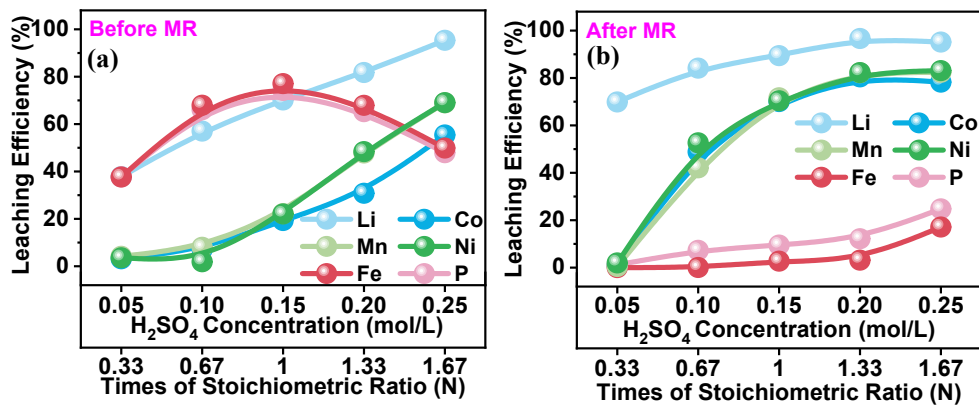

**Fig. S7.** The leaching behaviors for samples ( $\text{LiFePO}_4$  and  $\text{LiNi}_{0.5}\text{Co}_{0.2}\text{Mn}_{0.3}\text{O}_2$ ) with different acid concentrations before (a) and after (b) mechanochemical reaction. (conditions: molar ratio of NCM:LFP = 1:1, rotation speed- 650 rpm, mechanical milling time- 5 h, mass ratio of ball to powder- 50:1).

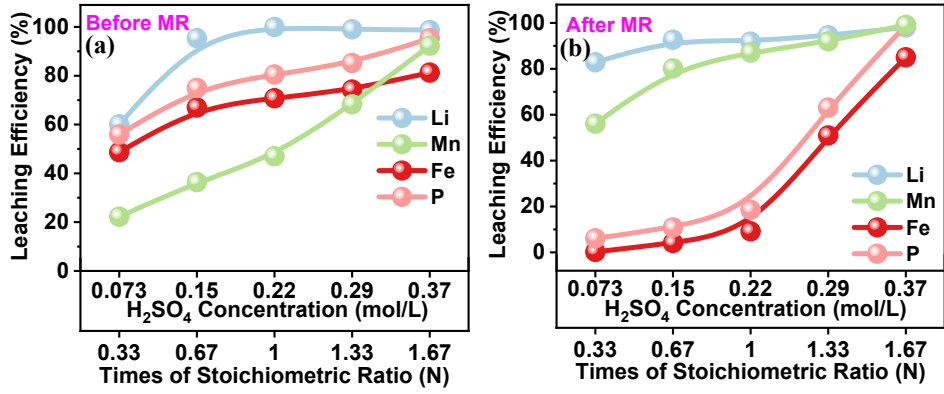

**Fig. S8.** Leaching behaviors for samples (LiFePO<sub>4</sub> and LiMn<sub>2</sub>O<sub>4</sub>) with different acid concentrations before (a) and after (b) mechanochemical reaction (conditions: molar ratio of LMO:LFP = 1:3, rotation speed- 650 rpm, mechanical milling time- 5 h, mass ratio of ball to powder- 50:1).

**Table S1** A brief comparison of the traditional methods with mechanochemical method for the recycling of valuable metals from Spent LIBs <sup>1-3</sup>

| Recycling method | Advantages                                                                                                          | Disadvantages                                                                                                     |
|------------------|---------------------------------------------------------------------------------------------------------------------|-------------------------------------------------------------------------------------------------------------------|
| Pyrometallurgy   | Wide application; Large-scale; Less pretreatment.                                                                   | Extensive energy consumption; Significant loss of Li; Harmful gases emission.                                     |
| Hydrometallurgy  | High efficiency; High purified products; Low energy consumption; Flexible recycling processes for different metals. | Complicated pretreatment; Extensive chemical consumption; Effluent discharging; Uneconomical for (LFP) batteries. |
| Mechanochemistry | Avoidance of extra wastes; Mild and safe processing environment; High reactivity derived by mechanochemical force.  | Limited processing capacity; Long processing time; Additional further refining.                                   |

**Table S2** Analytical methods.

| No. | Instrument                                                              | Types                   | Area                                       |
|-----|-------------------------------------------------------------------------|-------------------------|--------------------------------------------|
| 1   | Laser Particle Sizer                                                    | NAMO-ZS                 | Malvern, Britain                           |
| 2   | FT-IR spectroscopy                                                      | Scientific Nicolet iS10 | Thermo Fisher, U.S.A.                      |
| 3   | Raman spectra                                                           | DXRxi                   | Thermo Fisher, U.S.A.                      |
| 4   | X-ray diffraction (XDR)                                                 | Dmax-RB12KW             | Rigaku, Japan                              |
| 5   | Nitrogen gas adsorption instrument                                      | ASAP 2460 sn:506        | Micromeritics, U.S.A.                      |
| 6   | Contact angle meter (sessile drop method)                               | JY-82B Kruss DSA        | Dataphysics Instrument Co., Ltd., Germany. |
| 7   | X-ray photoelectron spectroscopy (XPS)                                  | AXIS SUPRA              | Kratos, Britain                            |
| 8   | High-resolution field emission transmission electron microscopy (HRTEM) | JEM-2100F               | JEOL, Japan                                |
| 9   | Inductively Coupled Plasma Optical Emission Spectrometer (ICP-OES)      | Optima 5300 DV          | Perkin Elmer Instruments, U.S.A.           |
| 10  | Field Emission Scanning Electron Microscopy (FESEM)                     | MIRA3                   | TESCAN                                     |
| 11  | X-ray EDS Analysis                                                      | X-MAX                   | Oxford, Britain                            |

**Table S3** Normal diffraction JCPDS cards of related compounds.

| Compounds                      | Normal diffraction JCPDS cards |
|--------------------------------|--------------------------------|
| LiCoO <sub>2</sub>             | PDF#75-0532                    |
| Co <sub>3</sub> O <sub>4</sub> | PDF#43-1003                    |
| LiFePO <sub>4</sub>            | PDF#81-1173                    |
| FePO <sub>4</sub>              | PDF#29-0715                    |

**Table S4** Fitting peaks of XPS spectra for the Co2p of LCO powders activated after different milling times.

|    |              | Co 2p <sub>3/2</sub> |                  |                      |                      | Co 2p <sub>1/2</sub> |                  |                      |                      | Content (wt%)    |                  |
|----|--------------|----------------------|------------------|----------------------|----------------------|----------------------|------------------|----------------------|----------------------|------------------|------------------|
|    |              | Peak1                | Peak2            | Peak3                | Peak4                | Peak5                | Peak6            | Peak7                | Peak8                | Co <sup>2+</sup> | Co <sup>3+</sup> |
|    |              | Co <sup>3+</sup>     | Co <sup>2+</sup> | Co <sup>2+</sup> Sat | Co <sup>3+</sup> Sat | Co <sup>3+</sup>     | Co <sup>2+</sup> | Co <sup>2+</sup> Sat | Co <sup>3+</sup> Sat |                  |                  |
| 0  | Position(eV) | 779.65               | 780.85           | 781.47               | 789.45               | 794.65               | 795.85           | 797.24               | 805.00               | 29.54            | 70.46            |
|    | Aera (%)     | 22.69                | 9.51             | 19.58                | 8.61                 | 11.34                | 4.76             | 12.59                | 10.91                |                  |                  |
| 1h | Position(eV) | 779.82               | 781.04           | 783.47               | 789.80               | 794.91               | 796.24           | 798.00               | 804.34               | 53.25            | 46.75            |
|    | Aera (%)     | 11.04                | 12.57            | 28.55                | 13.03                | 5.52                 | 6.29             | 9.01                 | 13.98                |                  |                  |
| 3h | Position(eV) | 779.70               | 780.95           | 782.57               | 787.88               | 794.80               | 796.15           | 798.89               | 804.44               | 60.73            | 39.27            |
|    | Aera (%)     | 9.52                 | 14.24            | 21.41                | 22.06                | 4.29                 | 7.12             | 8.73                 | 12.63                |                  |                  |
| 5h | Position(eV) | 779.67               | 780.81           | 783.24               | 788.12               | 794.66               | 796.01           | 797.77               | 803.06               | 72.69            | 27.31            |
|    | Aera (%)     | 5.90                 | 16.43            | 26.06                | 20.96                | 2.95                 | 7.12             | 5.98                 | 14.59                |                  |                  |
| 7h | Position(eV) | 779.62               | 780.57           | 783.25               | 788.36               | 794.62               | 795.87           | 798.71               | 804.48               | 73.36            | 26.64            |
|    | Aera (%)     | 6.16                 | 16.97            | 24.10                | 15.02                | 3.08                 | 8.48             | 11.76                | 14.42                |                  |                  |
| 9h | Position(eV) | 779.91               | 781.11           | 783.94               | 788.89               | 795.01               | 796.61           | 799.00               | 803.60               | 73.45            | 26.55            |
|    | Aera (%)     | 6.47                 | 17.65            | 24.02                | 15.13                | 3.04                 | 8.65             | 7.42                 | 17.62                |                  |                  |

The fitting data of the Co2p XPS spectra was calculated by the XPS peak software (Casa XPS).

$$\text{Content of Co}^{2+} = (\text{Aera}_{\text{peak2}} + \text{Aera}_{\text{peak6}}) / ((\text{Aera}_{\text{peak1}} + \text{Aera}_{\text{peak2}} + \text{Aera}_{\text{peak5}} + \text{Aera}_{\text{peak6}}))$$

$$\text{Content of Co}^{3+} = (\text{Aera}_{\text{peak1}} + \text{Aera}_{\text{peak5}}) / ((\text{Aera}_{\text{peak1}} + \text{Aera}_{\text{peak2}} + \text{Aera}_{\text{peak5}} + \text{Aera}_{\text{peak6}}))$$



**Table S5** Fitting peaks of XPS spectra for the Fe2p of LFP powders activated after different milling times.

|    |              | Fe 2p <sub>3/2</sub> |                  |                      |                      | Fe 2p <sub>1/2</sub> |                  |                      |                      | Content (wt%)    |                  |
|----|--------------|----------------------|------------------|----------------------|----------------------|----------------------|------------------|----------------------|----------------------|------------------|------------------|
|    |              | Peak1                | Peak2            | Peak3                | Peak4                | Peak5                | Peak6            | Peak7                | Peak8                | Fe <sup>2+</sup> | Fe <sup>3+</sup> |
|    |              | Fe <sup>2+</sup>     | Fe <sup>3+</sup> | Fe <sup>2+</sup> Sat | Fe <sup>3+</sup> Sat | Fe <sup>2+</sup>     | Fe <sup>3+</sup> | Fe <sup>2+</sup> Sat | Fe <sup>3+</sup> Sat |                  |                  |
| 0  | Position(eV) | 710.44               | 712.20           | 714.15               | 718.10               | 724.04               | 725.80           | 728.32               | 731.88               | 76.26            | 23.74            |
|    | Aera (%)     | 21.60                | 7.91             | 29.93                | 6.59                 | 10.36                | 5.29             | 14.37                | 3.95                 |                  |                  |
| 1h | Position(eV) | 710.47               | 711.93           | 713.96               | 716.9                | 723.87               | 725.33           | 726.68               | 730.60               | 52.65            | 47.35            |
|    | Aera (%)     | 12.97                | 11.91            | 15.19                | 24.16                | 6.48                 | 5.58             | 7.31                 | 16.41                |                  |                  |
| 3h | Position(eV) | 710.45               | 712.50           | 714.57               | 718.02               | 723.88               | 725.99           | 728.00               | 731.82               | 42.01            | 57.99            |
|    | Aera (%)     | 12.42                | 17.48            | 9.83                 | 23.59                | 6.83                 | 9.09             | 4.59                 | 16.18                |                  |                  |
| 5h | Position(eV) | 710.49               | 712.06           | 714.60               | 719.04               | 723.79               | 725.36           | 727.37               | 731.01               | 33.86            | 66.14            |
|    | Aera (%)     | 8.16                 | 16.27            | 19.59                | 24.48                | 4.08                 | 7.64             | 8.53                 | 11.25                |                  |                  |
| 7h | Position(eV) | 710.49               | 712.14           | 714.63               | 718.69               | 723.86               | 725.59           | 727.40               | 731.89               | 31.15            | 68.85            |
|    | Aera (%)     | 9.13                 | 21.71            | 14.65                | 21.20                | 5.11                 | 9.77             | 7.73                 | 10.71                |                  |                  |
| 9h | Position(eV) | 710.39               | 711.92           | 714.38               | 718.64               | 723.89               | 725.42           | 727.17               | 731.93               | 31.31            | 68.69            |
|    | Aera (%)     | 8.56                 | 18.78            | 18.35                | 19.19                | 4.28                 | 9.39             | 8.74                 | 12.70                |                  |                  |

The fitting data of the Fe2p XPS spectra was calculated by the XPS peak software (Casa XPS).

Content of Fe<sup>2+</sup> = (Aera<sub>peak1</sub> + Aera<sub>peak5</sub>) / (Aera<sub>peak1</sub> + Aera<sub>peak2</sub> + Aera<sub>peak5</sub> + Aera<sub>peak6</sub>)

Content of Fe<sup>3+</sup> = (Aera<sub>peak2</sub> + Aera<sub>peak6</sub>) / (Aera<sub>peak1</sub> + Aera<sub>peak2</sub> + Aera<sub>peak5</sub> + Aera<sub>peak6</sub>)

**Table S6** Thermodynamic data for the related species at 298.15 K.

| Substance                       | $\Delta_f G_m^\theta$ (kJ/mol) | Ref.    | Substance                                                              | $\Delta_f G_m^\theta$ (kJ/mol) | Ref. |
|---------------------------------|--------------------------------|---------|------------------------------------------------------------------------|--------------------------------|------|
| LiFePO <sub>4</sub>             | -1480.97                       | 4       | LiCoPO <sub>4</sub>                                                    | -5660.10                       | 5    |
| LiCoO <sub>2</sub>              | -620.22                        | 6       | LiNi <sub>0.5</sub> Co <sub>0.2</sub> Mn <sub>0.3</sub> O <sub>2</sub> | -640.04                        | 7    |
| CoO                             | -214.00                        | 8       | LiMn <sub>2</sub> O <sub>4</sub>                                       | -1374.80                       | 9    |
| Li <sub>2</sub> O               | -561.20                        | 8       | H <sub>2</sub> SO <sub>4</sub>                                         | -689.90                        | 8    |
| Co <sub>3</sub> O <sub>4</sub>  | -774.00                        | 8       | CoSO <sub>4</sub>                                                      | -782.40                        | 8    |
| Li <sub>3</sub> PO <sub>4</sub> | -2127.45                       | HSC 6.0 | Li <sub>2</sub> SO <sub>4</sub>                                        | -1331.20                       | 8    |
| Fe <sub>2</sub> O <sub>3</sub>  | -742.20                        | 8       | NiSO <sub>4</sub>                                                      | -790.30                        | 8    |
| FePO <sub>4</sub>               | -1179.30                       | 4       | MnSO <sub>4</sub>                                                      | -972.80                        | 8    |
| FeO                             | -251.40                        | 8       | H <sub>2</sub> O                                                       | -237.14                        | 8    |

**Table S7** Gibbs free energy values ( $\Delta_r G_m$ ) for Eq. (4)-(13) at 298.15 K.

| No.  | Reaction equation                                                                                                                                                                                                                  | $\Delta_r G_m$ (kJ/mol) |
|------|------------------------------------------------------------------------------------------------------------------------------------------------------------------------------------------------------------------------------------|-------------------------|
| (4)  | $10\text{LiFePO}_4 + 10\text{LiNi}_{0.5}\text{Co}_{0.2}\text{Mn}_{0.3}\text{O}_2 + 20\text{H}_2\text{SO}_4 = 10\text{FePO}_4 + 2\text{CoSO}_4 + 10\text{Li}_2\text{SO}_4 + 5\text{NiSO}_4 + 3\text{MnSO}_4 + 20\text{H}_2\text{O}$ | -3273.4                 |
| (5)  | $3\text{LiFePO}_4 + \text{LiMn}_2\text{O}_4 + 4\text{H}_2\text{SO}_4 = 3\text{FePO}_4 + 2\text{MnSO}_4 + 2\text{Li}_2\text{SO}_4 + 4\text{H}_2\text{O}$                                                                            | -517.155                |
| (6)  | $\text{LiFePO}_4 + \text{LiCoO}_2 = \text{FePO}_4 + \text{CoO} + \text{Li}_2\text{O}$                                                                                                                                              | 146.69                  |
| (7)  | $\text{LiFePO}_4 + 3\text{LiCoO}_2 = \text{FePO}_4 + \text{Co}_3\text{O}_4 + 2\text{Li}_2\text{O}$                                                                                                                                 | 265.93                  |
| (8)  | $2\text{LiFePO}_4 + \text{Co}_3\text{O}_4 = 2\text{FePO}_4 + 3\text{CoO} + \text{Li}_2\text{O}$                                                                                                                                    | 174.14                  |
| (9)  | $3\text{LiFePO}_4 + 3\text{LiCoO}_2 = 2\text{Li}_3\text{PO}_4 + \text{FePO}_4 + 3\text{CoO} + \text{Fe}_2\text{O}_3$                                                                                                               | -514.83                 |
| (10) | $2\text{LiFePO}_4 + 4\text{LiCoO}_2 = 2\text{Li}_3\text{PO}_4 + \text{Co}_3\text{O}_4 + \text{CoO} + \text{Fe}_2\text{O}_3$                                                                                                        | -1782.72                |
| (11) | $3\text{LiFePO}_4 + 6\text{LiCoO}_2 = 3\text{Li}_3\text{PO}_4 + 2\text{Co}_3\text{O}_4 + \text{Fe}_3\text{O}_4$                                                                                                                    | -208.32                 |
| (12) | $3\text{LiFePO}_4 + \text{Co}_3\text{O}_4 = \text{Li}_3\text{PO}_4 + 3\text{CoO} + 2\text{FePO}_4 + \text{FeO}$                                                                                                                    | -162.54                 |
| (13) | $2\text{LiFePO}_4 + 2\text{LiCoO}_2 = 2\text{LiCoPO}_4 + \text{Fe}_2\text{O}_3 + \text{Li}_2\text{O}$                                                                                                                              | -8421.22                |

**Notes:** It is worth to notice that the values of  $\Delta_r G_m$  for Eq. (6)-(8) are positive, indicating that these chemical reactions cannot be spontaneously processed under such available conditions. However, it has been well acknowledged that high temperature and high pressure can be generated during the intense collision among the fine particles with balls, which can promote and realize the chemical reactions that are thermodynamic impossible<sup>10, 11</sup>. Besides, it has been proved by this study from the experimental, characterization and theoretical results that the targeted products have been generated by the mechanochemical process.

## Reference:

1. F. Arshad, L. Li, K. Amin, E. Fan, N. Manurkar, A. Ahmad, J. Yang, F. Wu and R. Chen, *ACS Sustain. Chem. Eng.*, 2020, **8**, 13527-13554.
2. J. J. Roy, S. Rarotra, V. Krikstolaityte, Z. K. W, Y. D. Cindy, X. Y. Tan, M. Carboni, D. Meyer, Q. Yan and M. Srinivasan, *Adv. Mater.*, 2021, DOI: 10.1002/adma.202103346, 2103346.
3. X. Xia and P. Li, *Sci. Total Environ.*, 2022, **814**, 152870.
4. A. V. Churikov, A. V. Ivanishchev, A. V. Ushakov, I. M. Gamayunova and I. A. Leenson, *Journal of Chemical & Engineering Data*, 2013, **58**, 1747-1759.
5. S. L. Shang, Y. Wang, Z. G. Mei, X. D. Hui and Z. K. Liu, *J. Mater. Chem.*, 2012, **22**, 1142-1149.
6. S. Wang, C. Wang, F. Lai, F. Yan and Z. Zhang, *Waste Manage. (Oxford)*, 2020, **102**, 122-130.
7. Y. Lixin, Master of Engineering Lanzhou University of Technology 2019.
8. J. A. Dean, *Langes handbook of chemistry*, R. R. Donnelley & Sons Company, New York 1999.
9. Z. Li, L. He, Z. w. Zhao, D. Wang and W. Xu, *ACS Sustainable Chemistry & Engineering*, 2019, **7**, 16738-16746.
10. Q. Wu, *Mechanochemistry of inorganic materials*, Chemical Industry Press, Beijing, 2008.
11. H. Yang, *Mechanochemistry of materials*, Science Press, Beijing, 2009.
